# Supplementary material
Source: PubMed Central journal article supplement (PMC9338315)
Supplement: 41423_2022_881_MOESM1_ESM.pdf [file 41423_2022_881_MOESM1_ESM.pdf]

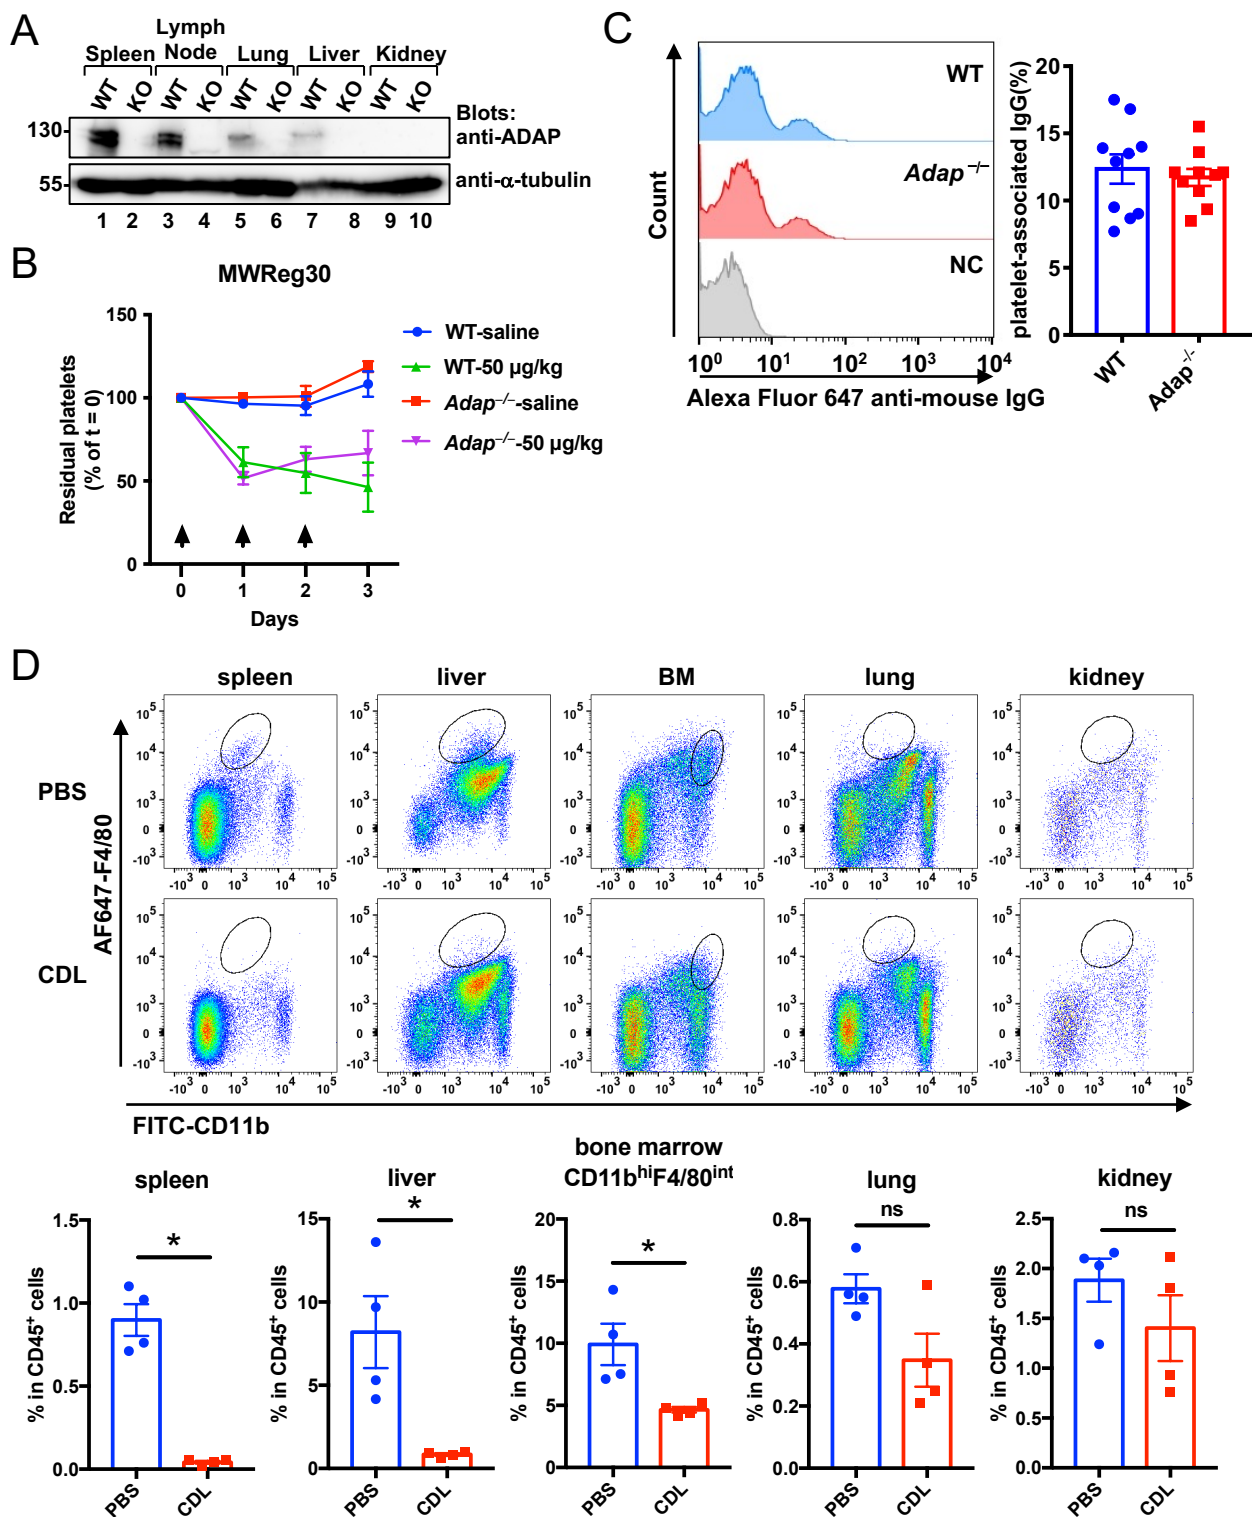

**Supplemental Figure 1. ADAP underexpression is associated with thrombocytopenia.**

**A** ADAP expression in different tissues of WT and *Adap*<sup>-/-</sup> mice (KO).

**B** WT and *Adap*<sup>-/-</sup> mice were treated with saline, or a daily low-dose of anti-GPIIb antibody MWReg30 (anti-CD41, IgG1) via i.v. as indicated (n = 4 mice in each group). Platelet counts were enumerated over a time course of 3 days and presented as percentages of those prior to antibody injection at Day 0.

**C** Flow cytometric analysis of antiplatelet antibody in the sera of WT and *Adap*<sup>-/-</sup> mice. Washed platelets were incubated with sera from WT mice (n = 10) and *Adap*<sup>-/-</sup> mice (n = 10), or BSA as a negative control, and stained with Alexa Fluor 647 anti-mouse IgG. The percentages of Alexa Fluor 647-positive platelet were plotted on the right panel.

**D** Flow cytometric analysis of tissue-resident macrophage (CD11b<sup>hi</sup>F4/80<sup>hi</sup>) in the spleen, liver, lung, and kidney, or monocyte-derived macrophage (CD11b<sup>hi</sup>F4/80<sup>int</sup>) in the bone marrow from mice intravenously injected with either clodronate liposomes or PBS liposomes as a control (n = 4, Mann-Whitney *U* test). The macrophage frequencies in the spleen, liver, and bone marrow were largely decreased at two days after clodronate liposome injection.

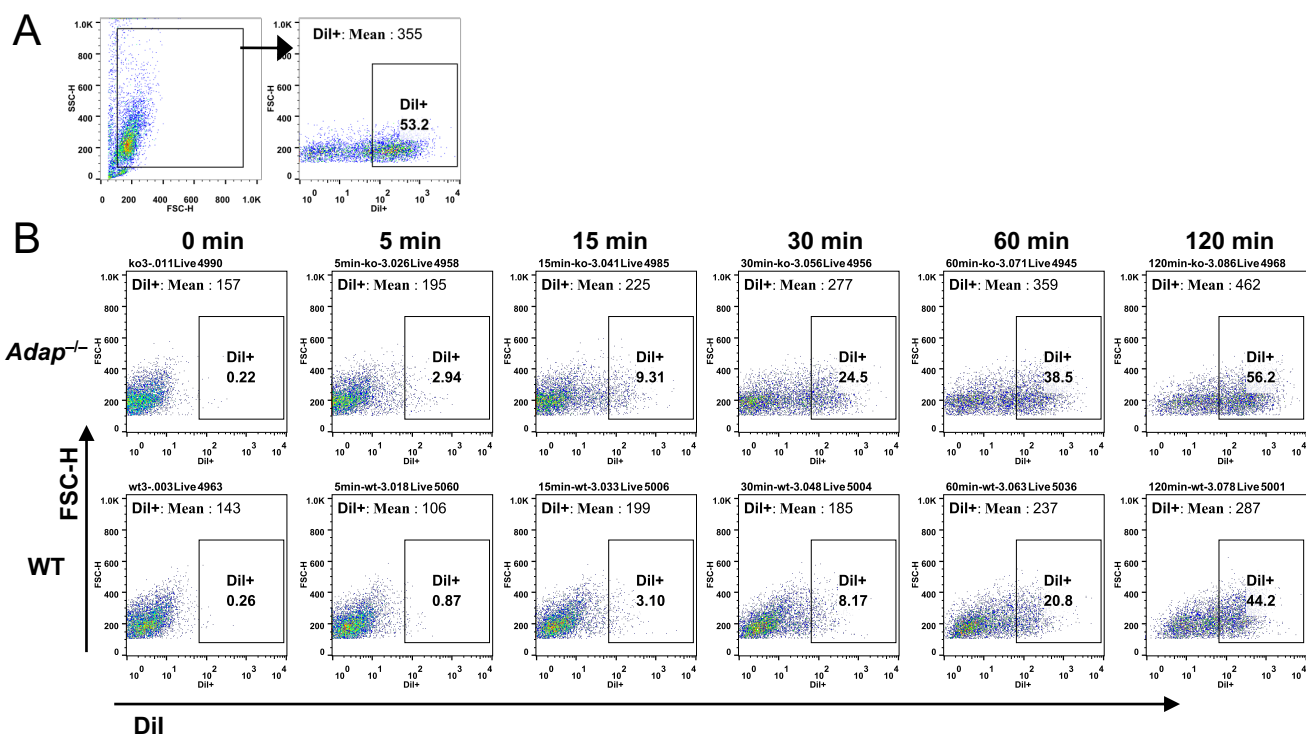

**Supplementary Figure 2. Gating strategy and representative plots for the *in vitro* phagocytosis assay by flow cytometry.**

**A-B** Gating strategy (A) and representative plots (B) for the *in vitro* phagocytosis assay as shown in Figure 2A. The percentage and the mean fluorescence intensity of Dil-positive cells were determined. The phagocytic index was calculated as the mean fluorescence intensity multiplied by the percentage of Dil-positive cells.

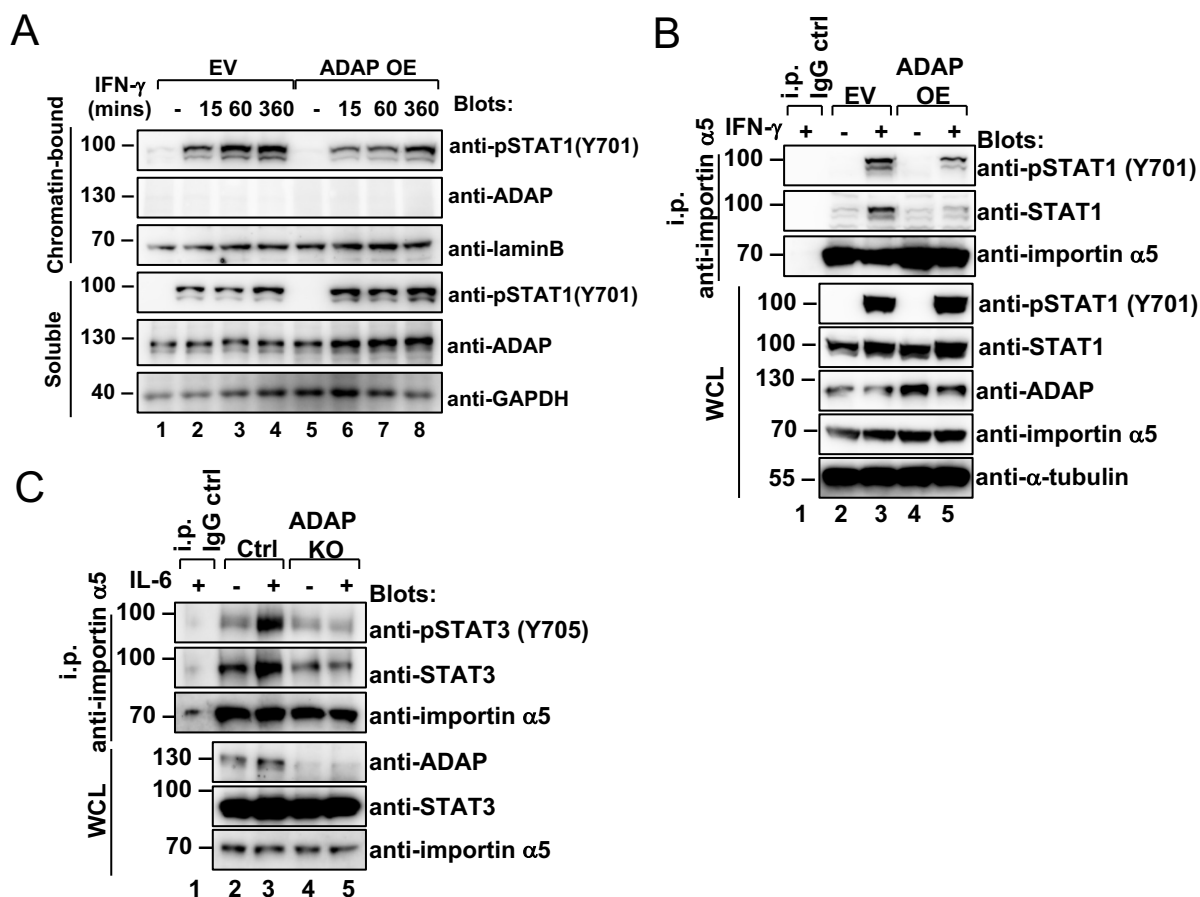

**Supplementary Figure 3. ADAP negatively targets STAT1/importin  $\alpha 5$  module but not STAT3 /importin  $\alpha 5$ .**

**A** Immunoblot analysis of pY701-STAT1 in soluble and chromatin-bound fractions in empty vector- or ADAP-overexpressed (OE) RAW264.7 cells. Cells were stimulated with IFN- $\gamma$  at the indicated time points and subjected to cellular fractionation, followed by Western-blot analysis with indicated antibodies.

**B** Immunoprecipitation and immunoblot analysis of the STAT1/ importin  $\alpha 5$  interaction in empty vector- or ADAP-overexpressed RAW264.7 cells with or without IFN- $\gamma$  stimulation.

**C** The effects of ADAP deficiency on the interaction between STAT3 and importin  $\alpha 5$  in response to IL-6 stimulation. The interaction between STAT1 and importin  $\alpha 5$  was determined by immunoprecipitation with anti-importin  $\alpha 5$ , followed by immunoblotting with pY701-STAT1 antibody in WT or ADAP-KO RAW264.7 cells.

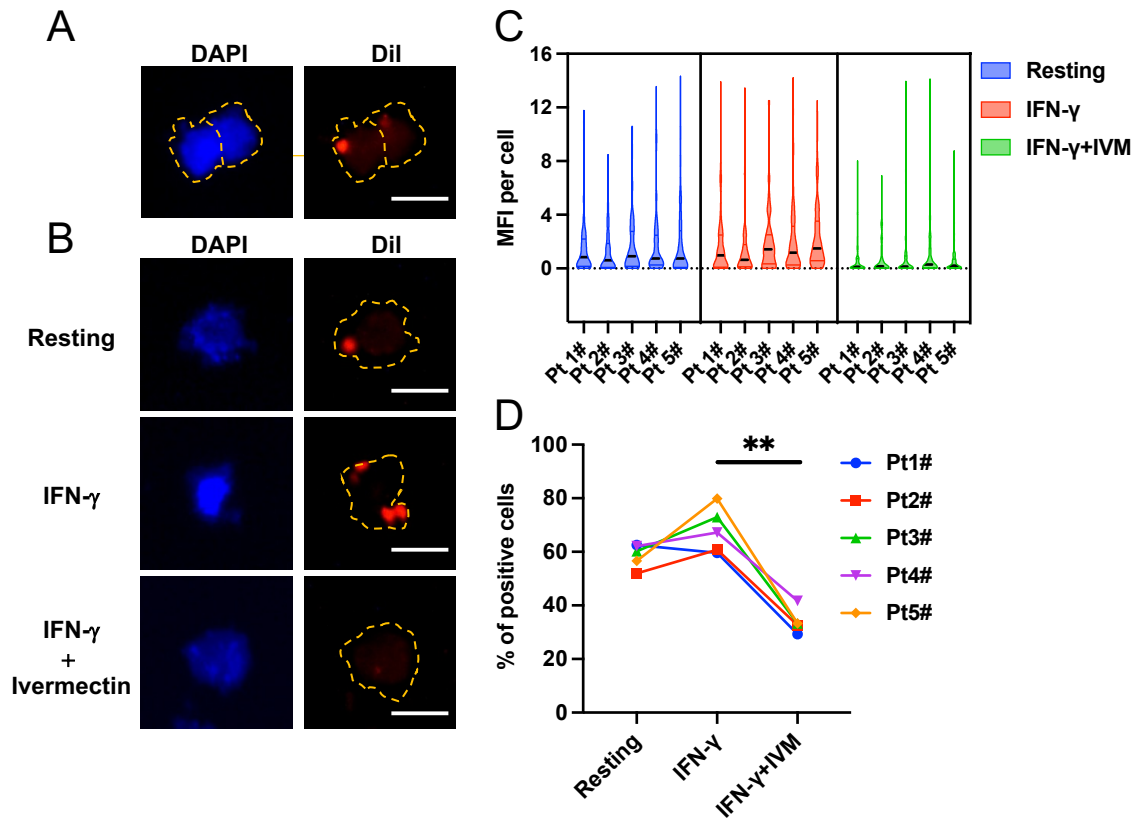

**Supplemental Figure 4. *In vitro* phagocytosis of Dil-labelled anti-SRBC IgG-opsonized SRBCs by monocyte-derived macrophages from ITP patients.**

**A-D** In relation to Figure 6F, monocyte-derived macrophages from 5 ITP patients were subjected to stimulation as indicated before incubation with Dil-labelled and anti-SRBC opsonized SRBC for 2 hr. Nuclei were stained with DAPI and cells were outlined by dashed lines (**A-B**), within which the MFI of each cell is determined and plotted in the violin plot (**C**). A total of approx. 100 cells in each group were analysed. The percentages of SRBC-phagocytosed monocyte-derived macrophages in each group were plotted in the histogram in **D** (n = 5, one-way ANOVA, Tukey's multiple comparison). Scale bars denote 5  $\mu$ m.

**Supplemental Table 1. Demographic and clinical characteristics of patients with ITP and splenic trauma.**

| platelet count (10 <sup>9</sup> /L) |     |     |                 |                         |                                |                         |
|-------------------------------------|-----|-----|-----------------|-------------------------|--------------------------------|-------------------------|
| Patient ID                          | Age | Sex | pre-splenectomy | 1 week post-splenectomy | Prior treatment                | Disease duration (year) |
| 1                                   | 25  | F   | 14              | 165                     | steroids                       | 1+                      |
| 2                                   | 31  | M   | 50              | 139                     | steroids, IVIg                 | 2+                      |
| 3                                   | 13  | M   | 75              | 838 <sup>a</sup>        | steroids, herbs, CsA           | 5+                      |
| 4                                   | 45  | M   | 40              | 258                     | steroids, herbs,               | 1+                      |
| 5                                   | 73  | M   | 35              | 20 <sup>a</sup>         | steroids                       | 1+                      |
| 6                                   | 40  | M   | 9               | 396                     | steroids                       | 1+                      |
| 7                                   | 71  | M   | 90              | 90                      | steroids, herbs, IVIg          | 1+                      |
| 8                                   | 62  | F   | 10              | 372 <sup>a</sup>        | steroids, IVIg                 | 7+                      |
| 9                                   | 28  | M   | 74              | 109                     | steroids                       | 1+                      |
| 10                                  | 34  | F   | 19              | 112 <sup>a</sup>        | steroids                       | 4+                      |
| 11                                  | 19  | F   | 128             | 430                     | /                              | /                       |
| 12                                  | 47  | M   | 235             | 110                     | /                              | /                       |
| 13                                  | 56  | M   | 101             | 101                     | /                              | /                       |
| 14                                  | 57  | M   | 111             | 135                     | /                              | /                       |
| 15                                  | 58  | M   | 159             | 127                     | /                              | /                       |
| 16                                  | 61  | F   | 139             | 115                     | /                              | /                       |
| 17                                  | 34  | F   | 246             | 173                     | /                              | /                       |
| 18                                  | 48  | M   | 409             | 200                     | /                              | /                       |
| 19                                  | 55  | M   | 187             | 158                     | /                              | /                       |
| 20                                  | 53  | M   | 248             | 229                     | /                              | /                       |
| 21                                  | 17  | M   | 395             | 265                     | /                              | /                       |
| 22                                  | 51  | F   | 289             | 334                     | /                              | /                       |
| 23                                  | 72  | M   | 121             | 166                     | /                              | /                       |
| 24                                  | 38  | M   | 253             | 333                     | /                              | /                       |
| 25                                  | 46  | M   | 207             | 375                     | /                              | /                       |
| 26                                  | 25  | M   | 29              |                         | steroids, TPO, IVIg            | 1-                      |
| 27                                  | 71  | M   | 8               |                         | steroids, TPO, IVIg            | 1-                      |
| 28                                  | 20  | F   | 95              |                         | steroids, IVIg, CD20           | 1-                      |
| 29                                  | 38  | F   | 85              |                         | steroids, TPO, IVIg            | 1-                      |
| 30                                  | 56  | F   | 3               |                         | steroids, TPO, CsA, Herombopag | 5+                      |

<sup>a</sup> within two weeks post-splenectomy

IVIg, intravenous immunoglobulin; CsA, Cyclosporin A; TPO, thrombopoietin

Steroids include dexamethasone, prednisone, danatrol, hydrocortisone

Patient ID 1-10: ITP patients with splenectomy; 11-25: non-ITP patients with splenic trauma; 26-30: ITP patients providing PBMC

**Supplemental Table 2. Antibodies list.**

| Antibodies                                                                   | CLONE       | SOURCE                    | IDENTIFIER                       |
|------------------------------------------------------------------------------|-------------|---------------------------|----------------------------------|
| Rabbit anti-Stat1 antibody                                                   | n/a         | Cell Signaling Technology | Cat# 9172, RRID: AB_2198300      |
| Rabbit anti-Phospho-Stat1 (Tyr701) Antibody                                  | 58D6        | Cell Signaling Technology | Cat# 9167, RRID:AB_561284        |
| Rabbit anti-Phospho-Stat1 (Ser727) Antibody                                  | n/a         | Cell Signaling Technology | Cat# 9177, RRID:AB_2197983       |
| Rabbit anti-GAPDH Antibody                                                   | D16H11      | Cell Signaling Technology | Cat# 5174, RRID:AB_10622025      |
| Rabbit anti-Phospho-p44/42 MAPK (Erk1/2) (Thr202/Tyr204) antibody            | D13.14.4E   | Cell Signaling Technology | Cat# 4370, RRID:AB_2315112       |
| Rabbit anti-p44/42 MAPK (Erk1/2) antibody                                    | 137F5       | Cell Signaling Technology | Cat# 4695, RRID:AB_390779        |
| Rabbit anti-Phospho-p38 MAPK (Thr180/Tyr182) antibody                        | D3F9        | Cell Signaling Technology | Cat# 4511, RRID:AB_2139682       |
| Rabbit anti-p38 MAPK antibody                                                | D13E1       | Cell Signaling Technology | Cat# 8690, RRID:AB_10999090      |
| Rabbit anti-Akt (pan) antibody                                               | C67E7       | Cell Signaling Technology | Cat# 4691, RRID:AB_915783        |
| Rabbit anti-Integrin $\beta$ 3 antibody                                      | D7X3P       | Cell Signaling Technology | Cat# 13166, RRID:AB_2798136      |
| Rabbit anti-Phospho-Stat-3 (tyr705) antibody                                 | n/a         | Cell Signaling Technology | Cat# 9131, RRID:AB_331586        |
| Rabbit anti-Stat3 Antibody                                                   | n/a         | Cell Signaling Technology | Cat# 9132, RRID:AB_331588        |
| Anti-rabbit IgG (H+L), F(ab) 2 Fragment (Alexa Fluor 555 Conjugate) antibody | n/a         | Cell Signaling Technology | Cat# 4413, RRID:AB_10694110      |
| Anti-mouse IgG, HRP-linked Antibody                                          | n/a         | Cell Signaling Technology | Cat# 7076, RRID:AB_330924        |
| Anti-rabbit IgG, HRP-linked Antibody                                         | n/a         | Cell Signaling Technology | Cat# 7074, RRID:AB_2099233       |
| Rabbit anti-ADAP / SLAP-130 / Fyb antibody                                   | n/a         | Millipore                 | Cat# 07-546, RRID:AB_310704      |
| Mouse anti-HA antibody                                                       | HA-7        | Sigma-Aldrich             | Cat# H9658, RRID:AB_260092       |
| Mouse anti-FLAG antibody                                                     | M2          | Sigma-Aldrich             | Cat# F1804, RRID:AB_262044       |
| Rabbit anti-alpha Tubulin antibody                                           | n/a         | Abcam                     | Cat# ab4074, RRID:AB_2288001     |
| Alexa Fluor 488-conjugated anti-CD68                                         | KP1         | Abcam                     | Cat# ab222914                    |
| Rabbit anti-Phospho-SHP-1 (Tyr536) Antibody                                  | n/a         | Absin                     | Cat# abs130871                   |
| Mouse anti-p-Akt1/2/3 Antibody                                               | B-12        | Santa Cruz Biotechnology  | Cat# sc-377556                   |
| IRDye 800CW Donkey anti-Rabbit IgG antibody                                  | n/a         | LI-COR                    | Cat# 926-32213, RRID:AB_621848   |
| IRDye 680RD Goat anti-Mouse IgG antibody                                     | n/a         | LI-COR                    | Cat# 926-68070, RRID:AB_10956588 |
| Rabbit anti-Importin Alpha 5 antibody                                        | n/a         | Proteintech               | Cat# 18137-1-AP, RRID:AB_2133553 |
| Alexa Fluor 647-conjugated anti-F4/80 antibody                               | T45-2342    | BD Bioscience             | Cat# 565853, RRID:AB_2744474     |
| PE-conjugated Anti-Mouse CD64.1/Fc $\gamma$ RI                               | X54-5/7.1.1 | BD Bioscience             | Cat# 558455, RRID:AB_647241      |
| FITC-conjugated anti-CD41                                                    | MWReg30     | BD Bioscience             | Cat# 553848, RRID:AB_395085      |
| FITC-conjugated anti-mouse CD11b                                             | M1/70       | BD Bioscience             | Cat# 557396, RRID:AB_396679      |
| PE-conjugated anti-mouse CD45                                                | 30-F11      | BD Bioscience             | Cat# 553081, RRID:AB_394611      |
| FITC-conjugated anti-mouse CD3                                               | 17A2        | BD Bioscience             | Cat# 555274, RRID:AB_395698      |
| PerCP-Cy5.5-conjugated anti-mouse CD4                                        | RM4-5       | BD Bioscience             | Cat# 561115, RRID:AB_10563934    |
| APC-conjugated anti-mouse CD8a                                               | 53-6.7      | BD Bioscience             | Cat# 553035, RRID:AB_398527      |
| Ultra-LEAF Purified anti-mouse CD4 antibody                                  | GK1.5       | BioLegend                 | Cat# 100442, RRID:AB_11149488    |
| Ultra-LEAF Purified anti-mouse CD8a antibody                                 | 53-6.7      | BioLegend                 | Cat# 100746, RRID:AB_11147171    |
| purified anti-mouse CD20                                                     | SA271G2     | BioLegend                 | Cat# 152102, RRID:AB_2632610     |
| Ultra-LEAF Purified Rat IgG2b, kappa Isotype Ctrl antibody                   | n/a         | BioLegend                 | Cat# 400644, RRID:AB_11149687    |
| Purified anti-mouse CD32 (Fc $\gamma$ r2) antibody                           | S17012B     | BioLegend                 | Cat# 156402, RRID:AB_2783133     |
| PE anti-mouse CD16.2 (Fc $\gamma$ maRIV) antibody                            | 9E9         | BioLegend                 | Cat# 149504, RRID:AB_2565811     |
| PE anti-rat IgG2b antibody                                                   | MRG2b-85    | BioLegend                 | Cat# 408214, RRID:AB_2749893     |
| FITC anti-mouse MERTK (Mer) antibody                                         | 2B10C42     | BioLegend                 | Cat# 151503, RRID:AB_2617034     |
| PE anti-mouse CD19 antibody                                                  | 1D3/CD19    | BioLegend                 | Cat# 152407, RRID:AB_2629816     |
| Ultra-LEAF Purified anti-mouse CD41 antibody                                 | MWReg30     | BioLegend                 | Cat# 133940, RRID:AB_2810396     |
| Antibodies for Platelet Depletion in Mice antibody                           | n/a         | Emfret                    | Cat# R300, RRID:AB_2721041       |
| PE anti-CD16/FCGR3 antibody                                                  | #002        | Sino Biological           | Cat# 50326-R002-P                |
| FITC-conjugated streptavidin                                                 | n/a         | eBioscience               | Cat# 11-4317-87                  |
| Goat Anti-Mouse IgG (H+L) Antibody, Alexa Fluor-647 Conjugated               | n/a         | Molecular Probes          | Cat# A-21235, RRID:AB_2535804    |
